# Supplementary material for: Comprehensive Analysis of Clinical Significance, Immune Infiltration and Biological Role of m6A Regulators in Early-Stage Lung Adenocarcinoma
Source: Front Immunol. 2021 Sep 28;12:698236. doi: 10.3389/fimmu.2021.698236 (PMC8505809; doi:10.3389/fimmu.2021.698236)
Supplement: Supplementary file 14 [file Table_4.xlsx]

## Sheet: coefficient
Table S3. Correlation among expression levels of m6A regulators.
	CBLL1	VIRMA	METTL14	METTL3	RBM15	RBM15B	WTAP	ZC3H13	ELAVL1	FMR1	HNRNPA2B1	HNRNPC	IGF2BP1	IGF2BP2	IGF2BP3	LRPPRC	YTHDC1	YTHDC2	YTHDF1	YTHDF2	YTHDF3	ALKBH5	FTO
CBLL1	1	0.58842	0.559482	0.250621	0.505006	0.352894	0.41284	0.488826	0.458397	0.502691	0.45673	0.37737	0.138779	0.318614	0.332207	0.545749	0.511218	0.368476	0.408693	0.371203	0.542246	0.195564	0.292679
VIRMA	0.58842	1	0.492011	0.348163	0.515526	0.362511	0.379908	0.447107	0.425629	0.464268	0.393252	0.448743	0.154057	0.272095	0.36532	0.620883	0.525893	0.339964	0.346318	0.352313	0.764142	0.257246	0.374036
METTL14	0.559482	0.492011	1	0.288231	0.543306	0.374107	0.355181	0.656854	0.36132	0.504621	0.468489	0.244248	0.00247049	0.222039	0.107855	0.367056	0.736415	0.65726	0.313256	0.477272	0.510777	0.218328	0.534173
METTL3	0.250621	0.348163	0.288231	1	0.392265	0.250684	0.0958268	0.233403	0.260654	0.412175	0.48072	0.222429	0.0631611	0.0716411	0.164333	0.256544	0.437966	0.375934	0.236915	0.185502	0.193588	0.15814	0.121416
RBM15	0.505006	0.515526	0.543306	0.392265	1	0.196215	0.337998	0.472237	0.315595	0.542342	0.525704	0.24137	0.0987683	0.248697	0.318565	0.479978	0.598064	0.590224	0.277122	0.337103	0.441511	0.105716	0.280281
RBM15B	0.352894	0.362511	0.374107	0.250684	0.196215	1	0.0328787	0.545736	0.625343	0.233798	0.538474	0.246002	0.139186	0.197606	0.0670345	0.347379	0.559205	0.220142	0.498591	0.471791	0.16506	0.475975	0.272574
WTAP	0.41284	0.379908	0.355181	0.0958268	0.337998	0.0328787	1	0.233917	0.235978	0.382534	0.220509	0.429867	0.117095	0.310747	0.317896	0.340002	0.275956	0.300167	0.187935	0.302974	0.451748	0.155642	0.244487
ZC3H13	0.488826	0.447107	0.656854	0.233403	0.472237	0.545736	0.233917	1	0.494613	0.464233	0.590682	0.162202	0.134755	0.304878	0.146135	0.37904	0.763697	0.537706	0.372266	0.372607	0.375733	0.408541	0.527499
ELAVL1	0.458397	0.425629	0.36132	0.260654	0.315595	0.625343	0.235978	0.494613	1	0.407184	0.67479	0.453541	0.187285	0.2928	0.237708	0.451203	0.552531	0.296599	0.553104	0.500026	0.247455	0.536137	0.358974
FMR1	0.502691	0.464268	0.504621	0.412175	0.542342	0.233798	0.382534	0.464233	0.407184	1	0.522074	0.227288	0.0608976	0.282491	0.241448	0.367601	0.597005	0.524465	0.347479	0.367392	0.435803	0.264078	0.391117
HNRNPA2B1	0.45673	0.393252	0.468489	0.48072	0.525704	0.538474	0.220509	0.590682	0.67479	0.522074	1	0.278188	0.182222	0.294925	0.29565	0.411736	0.697531	0.445814	0.469647	0.400839	0.213097	0.367326	0.30545
HNRNPC	0.37737	0.448743	0.244248	0.222429	0.24137	0.246002	0.429867	0.162202	0.453541	0.227288	0.278188	1	0.242261	0.137302	0.312956	0.566932	0.234126	0.0644595	0.273956	0.406572	0.418754	0.181463	0.083345
IGF2BP1	0.138779	0.154057	0.00247049	0.0631611	0.0987683	0.139186	0.117095	0.134755	0.187285	0.0608976	0.182222	0.242261	1	0.328314	0.449352	0.307894	0.0720268	-0.0794233	0.145008	0.0260331	0.110975	0.0524768	-0.0640716
IGF2BP2	0.318614	0.272095	0.222039	0.0716411	0.248697	0.197606	0.310747	0.304878	0.2928	0.282491	0.294925	0.137302	0.328314	1	0.460553	0.231785	0.23885	0.16901	0.173827	0.00565937	0.183696	0.102932	0.0730952
IGF2BP3	0.332207	0.36532	0.107855	0.164333	0.318565	0.0670345	0.317896	0.146135	0.237708	0.241448	0.29565	0.312956	0.449352	0.460553	1	0.412553	0.103943	0.0964134	0.147221	0.0851791	0.281232	0.0321228	0.0663691
LRPPRC	0.545749	0.620883	0.367056	0.256544	0.479978	0.347379	0.340002	0.37904	0.451203	0.367601	0.411736	0.566932	0.307894	0.231785	0.412553	1	0.425724	0.209818	0.409202	0.360523	0.553628	0.225307	0.239776
YTHDC1	0.511218	0.525893	0.736415	0.437966	0.598064	0.559205	0.275956	0.763697	0.552531	0.597005	0.697531	0.234126	0.0720268	0.23885	0.103943	0.425724	1	0.638521	0.469826	0.490684	0.419979	0.397986	0.526893
YTHDC2	0.368476	0.339964	0.65726	0.375934	0.590224	0.220142	0.300167	0.537706	0.296599	0.524465	0.445814	0.0644595	-0.0794233	0.16901	0.0964134	0.209818	0.638521	1	0.19832	0.290701	0.35816	0.156046	0.44468
YTHDF1	0.408693	0.346318	0.313256	0.236915	0.277122	0.498591	0.187935	0.372266	0.553104	0.347479	0.469647	0.273956	0.145008	0.173827	0.147221	0.409202	0.469826	0.19832	1	0.420737	0.25625	0.386694	0.244554
YTHDF2	0.371203	0.352313	0.477272	0.185502	0.337103	0.471791	0.302974	0.372607	0.500026	0.367392	0.400839	0.406572	0.0260331	0.00565937	0.0851791	0.360523	0.490684	0.290701	0.420737	1	0.341985	0.344481	0.318878
YTHDF3	0.542246	0.764142	0.510777	0.193588	0.441511	0.16506	0.451748	0.375733	0.247455	0.435803	0.213097	0.418754	0.110975	0.183696	0.281232	0.553628	0.419979	0.35816	0.25625	0.341985	1	0.0819124	0.335092
ALKBH5	0.195564	0.257246	0.218328	0.15814	0.105716	0.475975	0.155642	0.408541	0.536137	0.264078	0.367326	0.181463	0.0524768	0.102932	0.0321228	0.225307	0.397986	0.156046	0.386694	0.344481	0.0819124	1	0.397465
FTO	0.292679	0.374036	0.534173	0.121416	0.280281	0.272574	0.244487	0.527499	0.358974	0.391117	0.30545	0.083345	-0.0640716	0.0730952	0.0663691	0.239776	0.526893	0.44468	0.244554	0.318878	0.335092	0.397465	1

## Sheet: p.value
Table S4. Correlation among expression levels of m6A regulators.
	CBLL1	VIRMA	METTL14	METTL3	RBM15	RBM15B	WTAP	ZC3H13	ELAVL1	FMR1	HNRNPA2B1	HNRNPC	IGF2BP1	IGF2BP2	IGF2BP3	LRPPRC	YTHDC1	YTHDC2	YTHDF1	YTHDF2	YTHDF3	ALKBH5	FTO
CBLL1	0	9.4811e-36	8.87568e-32	1.08275e-06	2.81864e-25	2.91491e-12	1.27894e-16	1.46444e-23	1.43029e-20	5.02509e-25	2.04519e-20	6.20511e-14	0.00759107	3.76217e-10	5.88286e-11	5.01665e-30	5.84204e-26	2.61097e-13	2.73998e-16	1.68846e-13	1.36299e-29	0.00015652	1.01001e-08
VIRMA	9.4811e-36	0	6.84223e-24	5.91063e-12	1.92458e-26	6.67831e-13	4.08446e-14	1.55161e-19	1.14059e-17	3.99579e-21	4.26485e-15	1.10447e-19	0.00300685	1.09893e-07	4.30158e-13	1.04433e-40	1.2455e-27	1.95691e-11	7.76177e-12	3.18127e-12	7.1716e-72	5.46207e-07	1.06883e-13
METTL14	8.87568e-32	6.84223e-24	0	1.71999e-08	1.00863e-29	1.05661e-13	2.06268e-12	6.29983e-47	8.03761e-13	3.10389e-25	1.57332e-21	2.05412e-06	0.962278	1.67279e-05	0.0383743	3.27063e-13	2.92854e-64	5.29958e-47	7.62334e-10	2.1687e-22	6.5404e-26	2.32797e-05	1.30582e-28
METTL3	1.08275e-06	5.91063e-12	1.71999e-08	0	5.05802e-15	1.07584e-06	0.0659504	5.86915e-06	3.81314e-07	1.44609e-16	9.80819e-23	1.6152e-05	0.226134	0.169667	0.00153713	5.87843e-07	1.00316e-18	7.84843e-14	4.20025e-06	0.000340416	0.0001829	0.00231407	0.0196457
RBM15	2.81864e-25	1.92458e-26	1.00863e-29	5.05802e-15	0	0.000148653	2.59414e-11	6.80094e-22	5.61041e-10	1.32643e-29	1.31057e-27	2.72726e-06	0.0580292	1.31609e-06	3.78681e-10	1.16441e-22	3.65459e-37	5.1993e-36	6.2452e-08	2.9473e-11	4.89662e-19	0.042403	4.35285e-08
RBM15B	2.91491e-12	6.67831e-13	1.05661e-13	1.07584e-06	0.000148653	0	0.528952	5.03569e-30	1.95734e-41	5.65417e-06	3.94748e-29	1.72505e-06	0.00741419	0.000133051	0.198874	6.63707e-12	9.64756e-32	1.98215e-05	1.38405e-24	7.51887e-22	0.00146368	2.91659e-22	1.04187e-07
WTAP	1.27894e-16	4.08446e-14	2.06268e-12	0.0659504	2.59414e-11	0.528952	0	5.59053e-06	4.59472e-06	2.63946e-14	1.91827e-05	5.00406e-18	0.0244846	1.05613e-09	4.13877e-10	1.94599e-11	7.12756e-08	4.03755e-09	0.000283122	2.84333e-09	5.88678e-20	0.00271823	2.00594e-06
ZC3H13	1.46444e-23	1.55161e-19	6.29983e-47	5.86915e-06	6.80094e-22	5.03569e-30	5.59053e-06	0	3.65228e-24	4.0269e-21	4.46174e-36	0.00177229	0.00955269	2.23701e-09	0.00491204	4.71441e-14	9.67888e-72	4.89438e-29	1.42296e-13	1.34686e-13	8.10975e-14	2.81696e-16	8.08096e-28
ELAVL1	1.43029e-20	1.14059e-17	8.03761e-13	3.81314e-07	5.61041e-10	1.95734e-41	4.59472e-06	3.65228e-24	0	3.6053e-16	2.33075e-50	4.03152e-20	0.000297487	9.95341e-09	3.89173e-06	6.60147e-20	7.00213e-31	6.27036e-09	5.91635e-31	9.7238e-25	1.49147e-06	7.57919e-29	1.155e-12
FMR1	5.02509e-25	3.99579e-21	3.10389e-25	1.44609e-16	1.32643e-29	5.65417e-06	2.63946e-14	4.0269e-21	3.6053e-16	0	3.45258e-27	1.03809e-05	0.243243	3.37258e-08	2.70638e-06	3.00031e-13	5.25329e-37	1.82612e-27	6.53964e-12	3.10102e-13	1.54742e-18	2.64372e-07	6.16454e-15
HNRNPA2B1	2.04519e-20	4.26485e-15	1.57332e-21	9.80819e-23	1.31057e-27	3.94748e-29	1.91827e-05	4.46174e-36	2.33075e-50	3.45258e-27	0	5.53202e-08	0.000434828	7.69245e-09	7.04232e-09	1.56825e-16	4.47783e-55	2.02732e-19	1.21551e-21	1.12681e-15	3.67406e-05	3.13395e-13	2.08064e-09
HNRNPC	6.20511e-14	1.10447e-19	2.05412e-06	1.6152e-05	2.72726e-06	1.72505e-06	5.00406e-18	0.00177229	4.03152e-20	1.03809e-05	5.53202e-08	0	2.49912e-06	0.00826465	7.92748e-10	9.18593e-33	5.48074e-06	0.216715	8.92728e-08	4.02855e-16	4.23597e-17	0.000459882	0.109964
IGF2BP1	0.00759107	0.00300685	0.962278	0.226134	0.0580292	0.00741419	0.0244846	0.00955269	0.000297487	0.243243	0.000434828	2.49912e-06	0	1.01041e-10	9.72706e-20	1.52419e-09	0.167374	0.127783	0.00525739	0.618154	0.0330794	0.314743	0.219499
IGF2BP2	3.76217e-10	1.09893e-07	1.67279e-05	0.169667	1.31609e-06	0.000133051	1.05613e-09	2.23701e-09	9.95341e-09	3.37258e-08	7.69245e-09	0.00826465	1.01041e-10	0	8.97998e-21	6.83544e-06	3.48547e-06	0.0011179	0.000798425	0.913722	0.000389725	0.0481777	0.161147
IGF2BP3	5.88286e-11	4.30158e-13	0.0383743	0.00153713	3.78681e-10	0.198874	4.13877e-10	0.00491204	3.89173e-06	2.70638e-06	7.04232e-09	7.92748e-10	9.72706e-20	8.97998e-21	0	1.34874e-16	0.0460085	0.0643037	0.00459866	0.102331	3.90135e-08	0.538473	0.203378
LRPPRC	5.01665e-30	1.04433e-40	3.27063e-13	5.87843e-07	1.16441e-22	6.63707e-12	1.94599e-11	4.71441e-14	6.60147e-20	3.00031e-13	1.56825e-16	9.18593e-33	1.52419e-09	6.83544e-06	1.34874e-16	0	1.1199e-17	4.86322e-05	2.49681e-16	9.09343e-13	5.07065e-31	1.24459e-05	3.18586e-06
YTHDC1	5.84204e-26	1.2455e-27	2.92854e-64	1.00316e-18	3.65459e-37	9.64756e-32	7.12756e-08	9.67888e-72	7.00213e-31	5.25329e-37	4.47783e-55	5.48074e-06	0.167374	3.48547e-06	0.0460085	1.1199e-17	0	1.18215e-43	1.16773e-21	9.40367e-24	3.36059e-17	1.8663e-15	9.51596e-28
YTHDC2	2.61097e-13	1.95691e-11	5.29958e-47	7.84843e-14	5.1993e-36	1.98215e-05	4.03755e-09	4.89438e-29	6.27036e-09	1.82612e-27	2.02732e-19	0.216715	0.127783	0.0011179	0.0643037	4.86322e-05	1.18215e-43	0	0.000125649	1.28115e-08	1.30881e-12	0.00264874	2.56089e-19
YTHDF1	2.73998e-16	7.76177e-12	7.62334e-10	4.20025e-06	6.2452e-08	1.38405e-24	0.000283122	1.42296e-13	5.91635e-31	6.53964e-12	1.21551e-21	8.92728e-08	0.00525739	0.000798425	0.00459866	2.49681e-16	1.16773e-21	0.000125649	0	2.91048e-17	6.0617e-07	1.31129e-14	1.99262e-06
YTHDF2	1.68846e-13	3.18127e-12	2.1687e-22	0.000340416	2.9473e-11	7.51887e-22	2.84333e-09	1.34686e-13	9.7238e-25	3.10102e-13	1.12681e-15	4.02855e-16	0.618154	0.913722	0.102331	9.09343e-13	9.40367e-24	1.28115e-08	2.91048e-17	0	1.46154e-11	1.01618e-11	3.63237e-10
YTHDF3	1.36299e-29	7.1716e-72	6.5404e-26	0.0001829	4.89662e-19	0.00146368	5.88678e-20	8.10975e-14	1.49147e-06	1.54742e-18	3.67406e-05	4.23597e-17	0.0330794	0.000389725	3.90135e-08	5.07065e-31	3.36059e-17	1.30881e-12	6.0617e-07	1.46154e-11	0	0.116232	3.92038e-11
ALKBH5	0.00015652	5.46207e-07	2.32797e-05	0.00231407	0.042403	2.91659e-22	0.00271823	2.81696e-16	7.57919e-29	2.64372e-07	3.13395e-13	0.000459882	0.314743	0.0481777	0.538473	1.24459e-05	1.8663e-15	0.00264874	1.31129e-14	1.01618e-11	0.116232	0	2.04547e-15
FTO	1.01001e-08	1.06883e-13	1.30582e-28	0.0196457	4.35285e-08	1.04187e-07	2.00594e-06	8.08096e-28	1.155e-12	6.16454e-15	2.08064e-09	0.109964	0.219499	0.161147	0.203378	3.18586e-06	9.51596e-28	2.56089e-19	1.99262e-06	3.63237e-10	3.92038e-11	2.04547e-15	0
